1 ORIGINAL RESEARCH ARTICLE: PLOS ONE

2 TITLE: CANINE COGNITIVE DYSFUNCTION (CCD) PATIENTS HAVE REDUCED

3 TOTAL HIPPOCAMPAL VOLUME COMPARED WITH AGING CONTROL DOGS: A

4 COMPARATIVE MRI STUDY

5 AUTHORS NAMES AND DEGREES:

6 Curtis Wells Dewey<sup>1,2</sup>, DVM, MS, CTCVMP, DACVIM (Neurology), DACVS; Mark Rishniw<sup>1</sup>,

7 BVSc, MS, PhD, DACVIM (Internal Medicine, Cardiology); Simon Platt, BVM&S, FRCVS,

8 DACVIM (Neurology), DECVN; Kelsey Robinson, DVM; Joseph Sackman<sup>2</sup>, AA, BS; Marissa

9 O'Donnell<sup>2</sup>, BS

10 AUTHOR AFFILIATIONS: Department of Clinical Sciences<sup>1</sup>, College of Veterinary Medicine,

11 Cornell University, Ithaca, NY; Rochester Veterinary Specialists and Emergency Services<sup>2</sup>,

12 Rochester, NY; Long Island Veterinary Specialists<sup>3</sup>, Plainview, NY

13 AUTHOR CONTACT INFORMATION:

14 CW Dewey: C4 169 Clinical Programs Center, Cornell University College of Veterinary

15 Medicine, Ithaca, NY 14853; [cwd27@cornell.edu](mailto:cwd27@cornell.edu)

16 M Rishniw: C2 015 Clinical Programs Center, Cornell University College of Veterinary

17 Medicine, Ithaca, NY 14853; [mr89@cornell.edu](mailto:mr89@cornell.edu)

18 SR Platt: Department of Small Animal Medicine & Surgery, College of Veterinary Medicine,

19 University of Georgia, 2200 College Station Rd, Athens, GA 30602; [srplatt@uga.edu](mailto:srplatt@uga.edu)

20 K Robinson: Department of Small Animal Medicine & Surgery, College of Veterinary Medicine,

21 University of Georgia, 2200 College Station Rd, Athens, GA 30602; [k.robinson@uga.edu](mailto:k.robinson@uga.edu)

22 J Sackman: Long Island Veterinary Specialists, 163 South Service Road, Plainview, NY 11803;

23 [jsackman@lives.org](mailto:jsackman@lives.org).

24 M O'Donnell: Long Island Veterinary Specialists, 163 South Service Road, Plainview, NY

25 11803; [modonnell@lives.org](mailto:modonnell@lives.org).

26

27

28

29

30

31

32

33

34

35

36

37

38

39

40

41 **Abstract**

42 Hippocampal atrophy is a key pathologic and MRI feature of human Alzheimer's disease (AD).  
43 Hippocampal atrophy has not been documented via MRI in canine cognitive dysfunction (CCD),  
44 which is considered the dog model of human AD. The purpose of this retrospective comparative  
45 volumetric MRI study was to compare total hippocampal volumes between successfully aging  
46 (control) dogs and dogs diagnosed with CCD. Mimics<sup>®</sup> software was used to derive total  
47 hippocampal volumes and total brain volumes from the MRI studies of 42 aging dogs ( $\geq 9$   
48 years): 16 dogs diagnosed with CCD and 26 successfully aging controls. Total hippocampal  
49 volume normalized to total brain volume was significantly less for CCD patients compared with  
50 control dogs ( $p=0.04$ ). The results of this study suggest that-similar to human AD-hippocampal  
51 atrophy is a pathological feature of CCD. This finding has potential importance for both  
52 investigating disease mechanisms related to dementia as well as future hippocampal-targeted  
53 therapies.

54

55

56

57

58

59

60

61

## 62 **Introduction**

63 Alzheimer's disease, a degenerative brain disorder of people, shares many clinical and  
64 pathological features with canine cognitive dysfunction (CCD), a disorder affecting aging dogs.

65 Consequently, investigators consider CCD a naturally occurring model for studying human

66 Alzheimer's disease. Furthermore, CCD commonly causes frustration for dog owners and

67 veterinarians.<sup>1,2</sup> Studies have documented hippocampal damage as an early and prominent

68 pathologic feature in both Alzheimer's disease and CCD and attributed this pathology to the

69 deposition of neurotoxic compounds such as beta-amyloid and tau proteins.<sup>3-5</sup>

70 In humans, volumetric measurement of the hippocampi from magnetic resonance images (MRI)

71 allows clinicians to assess the presence or absence of hippocampal atrophy, as a diagnostic

72 marker for Alzheimer's disease.<sup>6-8</sup> Additionally, MRI-based hippocampal volumetric

73 measurements are being evaluated as means of assessing responses to future hippocampal-based

74 treatment options for Alzheimer's disease.<sup>8,9</sup>

75 The use of MRI to assess hippocampal volume in dogs with CCD has not been reported. The

76 purpose of this MR imaging study was to compare total hippocampal volumes between dogs

77 with CCD and similarly aged control dogs. We hypothesized that dogs with CCD would have

78 smaller total hippocampal volumes compared with controls.

79

80

81

82

## 83 **Materials and Methods**

84 We searched MRI databases from five institutions (Cornell University Hospital for Animals,  
85 University of Georgia, Long Island Veterinary Specialists, Veterinary Specialty and Emergency  
86 Services of Rochester and Oradell Animal Hospital) for brain MRI scans of aging ( $\geq 9$  yrs old)  
87 dogs diagnosed with CCD and similarly aged dogs with no evidence of CCD (controls). Control  
88 dogs had undergone MRI imaging for reasons unrelated to CCD, including peripheral vestibular  
89 dysfunction, late-onset epilepsy, Horner's syndrome and blindness. Because relatively few aged  
90 dogs undergo cranial MRI scans for non-CNS disorders, we expanded our control group by  
91 acquiring additional control MRI scans from two sources: 10 mixed-breed retired sled dogs with  
92 normal neurologic examinations that had been imaged as part of another study and 6  
93 neurologically normal small-breed dogs whose owners volunteered for a no-cost brain MRI prior  
94 to scheduled dentistry procedures. Because of the nature of this study, the need for IACUC  
95 approval was waived by Cornell University's Institute for Animal Care and Use Committee.

96 We based our diagnosis of CCD on previously established historical and clinical criteria together  
97 with characteristic MRI abnormalities (excluding hippocampal measurements).<sup>1,10,11</sup> In addition,  
98 we only included cases of CCD for which this diagnosis was clearly stated in the medical record  
99 and supported by the MRI report.

100 All MRIs were performed under general anesthesia with one of six magnets: 1) 1.5 T Siemens  
101 Avanto (Munich, Germany) 2) 1.5 T Toshiba Vantage Elan (Lake Forest CA, USA) 3) 3.0 T  
102 Philips Achieva (Nutley NJ, USA) or 4) 3.0 T GE Discovery MR750 (Chicago IL, USA).

103 Imaging sequences acquired included the following: sagittal T2-weighted; transverse T2-and T1-  
104 weighted; transverse and dorsal plane T1-weighted post-gadolinium injection; transverse T2-  
105 fluid attenuated inversion recovery (FLAIR); and transverse T2\* gradient-recalled echo (GRE).

106 For the 1.5-T MRI units, measurement parameters were as follows: slice thickness, 3.5 mm; slice  
107 gap, 3.5 mm; FOV, 185 mm; matrix size of images, 480 x 480. For the 3.0-T MRI units,  
108 measurement parameters were as follows: slice thickness, 2.0 mm; slice gap, 1.0-3.0 mm  
109 (depending on dog size); FOV, 1101 mm; matrix size of images, 400 x 400.

110 For each dog, three-dimensional volumes were measured from T2-weighted brain images using  
111 Mimics<sup>®</sup> software by two observers (JS and MO) who were unaware of the status of the dogs in  
112 the study. Quantitative volumetric measurements of both hippocampi as well as total brain  
113 volume were acquired for each dog, as previously described (Figure 1).<sup>12</sup> Anatomic landmarks  
114 for measurements were used from published reference information.<sup>13,14</sup>

115 We then normalized total hippocampal volumes to total brain volume (rather than bodyweight)  
116 under the assumption that total brain volume would not change with CCD, and that total brain  
117 volume (but not bodyweight) remains unaffected by body condition (i.e. obesity, emaciation)  
118 according to the following equation:  $nVOL_{HIPP} = \frac{\text{Hippocampal Volume}}{\text{Total Brain Volume}} * 1000$

119 Because hippocampal volume represents a small percentage of total brain volume, we multiplied  
120 the volume ratio by 1000 to have more easily understood values.

## 121 **Statistical Analyses**

122 We compared all continuous variables (i.e. normalized hippocampal volumes, age) between the  
123 CCD dogs and control dogs using Mann Whitney U Tests.

124 To assess for both intra and inter-observer variability in measurements, 20 patient scans were  
125 were re-measured by both observers (JS and MO), neither of whom were aware of the patient

126 status (CCD vs control). Agreement between repeated measurements was examined using Limits  
127 of Agreement analysis.<sup>15</sup>

## 128 **Results**

129 We included 16 dogs with CCD and 26 control dogs in the study. Dogs with CCD were older  
130 than control dogs (median age 13 yrs vs 11.5 yrs;  $P=0.0002$ ); however, we could detect no  
131 negative correlation between advancing age and reduced hippocampal volume in either group  
132 (Figure 2). The CCD group comprised 2 Shih Tzus, 2 Springer spaniels and one each of  
133 Chihuahua, Miniature Poodle, Wheaten terrier, Labrador retriever, Tibetan terrier, Samoyed,  
134 Miniature Schnauzer, Cockapoo, German Shepherd, Shetland Sheepdog, Beagle and mixed  
135 breed. These consisted of 9 spayed females, 5 neutered and 2 intact males. The control group  
136 comprise 12 mixed breed dogs, 4 Chihuahuas and one each of Maltese, Boston terrier, Yorkshire  
137 terrier, Miniature Dachshund, Coonhound, Golden Retriever, West Highland White terrier,  
138 Beagle, Havanese and English Cocker Spaniel. These consisted of 13 spayed and 2 intact  
139 females, 7 neutered and 4 intact males.

140 Dogs with CCD had smaller normalized hippocampal volumes than control dogs (median 6.2 vs  
141 7.9;  $P=0.04$ ; Figure 3).

142

143

144

145

146

147

148

149

150

151

152 **Discussion**

153 Our study demonstrates that dogs afflicted with CCD have smaller hippocampal volumes  
154 compared to similarly aged control dogs without CCD. The differences were small, and showed  
155 a substantial degree of overlap between the two groups, suggesting that hippocampal volumetric  
156 measurements in dogs will be unable to discriminate between healthy and CCD dogs on an  
157 individual basis. However, our data suggest that hippocampal atrophy is not part of canine  
158 aging, as we could find no clear association between age and hippocampal volumes in either  
159 group.

160 Hippocampal atrophy is a key and early feature of human Alzheimer's disease, and loss of  
161 hippocampal neurons and synapses is strongly associated with cognitive decline in that  
162 disorder.<sup>3,4,16</sup> Hippocampal pathology has been documented in brains of dogs with CCD, but  
163 hippocampal atrophy has not been demonstrated for this disorder.<sup>5</sup> In addition to hippocampal  
164 atrophy being a central pathophysiologic aspect of Alzheimer's disease, the hippocampus is a  
165 source of neuronal stem and progenitor cells. Research into the roles of the hippocampus in  
166 Alzheimer's disease pathogenesis and potential methods of positively affecting hippocampal  
167 function to treat Alzheimer's disease patients is ongoing.<sup>17-21</sup> CCD is considered a naturally-  
168 occurring canine analogue of human Alzheimer's disease.<sup>1,2,5,10,11</sup> Hippocampal-directed research  
169 in CCD patients may potentially benefit dogs with that disorder and human Alzheimer's disease  
170 patients.

171 There are several limitations to this study, most of which are related to its retrospective nature.

172 Although multiple institutions were involved in recruiting case material, the case numbers are



173 still small. Also, the MR images evaluated were derived from multiple different machines, which  
174 could introduce some level of variability in the resultant data. We restricted case enrollment to  
175 dogs 9 yrs and older, in accordance with previous publications dealing with aging dogs.<sup>10,23,24</sup>  
176 Although the median ages of our CCD and control groups was not large (11.5 yrs vs 13 yrs), it  
177 was statistically significant. A major hurdle in this investigation was locating control MRIs for  
178 comparison, most likely due to the low likelihood of dog owners pursuing brain MRIs for very  
179 old dogs without evidence of neurologic impairment. The possibility exists that the smaller  
180 hippocampal volumes in our CCD group were due to this group being older than the control  
181 dogs, vs a sequela to a degenerative brain disorder. The authors consider this unlikely for several  
182 reasons. Graphic representation (Figure 2) of hippocampal volumes vs age do not support a  
183 decreasing volume with aging for either the control or CCD groups. In addition, logistic  
184 regression analysis of these data also failed to discern a negative correlation between advancing  
185 age and hippocampal volume in either group. Age-related hippocampal atrophy has been  
186 documented to occur as an aging change in dogs, when young dogs are compared with older  
187 dogs.<sup>23,24</sup> In one study, linear MRI measurements of the hippocampi normalized to brain height  
188 were compared between young (1-3 year old) and older (>10 year old) dogs with normal brain  
189 anatomy; a significant reduction of 2.64% was found between young and old dogs in that  
190 study.<sup>23</sup> Although the results of our volumetric study of older dogs is not directly comparable to  
191 the results of the linear MRI study, the percentage difference between our two groups of dogs  
192 was 21.5%. In a study of laboratory Beagle dogs, hippocampal volumes were compared between  
193 young and old dogs using MRI. The older dogs were subdivided into two categories: old dogs  
194 (aged 8-11 years) and senior dogs (aged 12 years and older). Although hippocampal volume was  
195 shown to decrease when older dogs were compared to younger dogs (< 8yrs of age), there was no

196 difference in hippocampal volume between the old and senior dog groups.<sup>24</sup> In other words, age-  
197 related hippocampal atrophy appears not to progress dramatically as a non-specific aging change  
198 in normal dogs over 8 years of age, based on the results of the Beagle study.

199 Future MRI investigations into hippocampal atrophy in dogs with CCD would benefit from  
200 prospective investigations with larger case numbers, more closely age-matched controls, more  
201 consistent imaging procurement (i.e., one machine model), and more structurally detailed images  
202 (e.g., diffusion tensor imaging and tractography). Additionally, comparison of linear MRI  
203 measurements of hippocampal volumes between CCD patients and successfully aging dogs  
204 should be performed. Hopefully, investigations into hippocampal-related aspects of Alzheimer's  
205 disease will benefit from CCD dogs as a disease model.

206 In conclusion, we demonstrated that dogs with CCD have significantly smaller total hippocampal  
207 volumes, as measured on MR images, compared with successfully aging controls. This finding  
208 may have implications in pathophysiologic and therapeutic research into hippocampal-associated  
209 aspects of CCD and Alzheimer's disease.

210

211

212

213

214

215

216

217

## 218 **References**

- 219 1. Dewey CW, Davies ES, Xie H, Wakshlag JJ. Canine cognitive dysfunction:  
220 pathophysiology, diagnosis and treatment. *Vet Clin Small Anim* 2019.  
221 <https://doi.org/10.1016/j.csvm.2019.01.013>.
- 222 2. Chapagain D, Range F, Huber L, et al. Cognitive aging in dogs. *Gerontology* 2018; 64:  
223 165-171.
- 224 3. Wang L, Benzinger TL, Hassenstab J, et al. Spatially distinct atrophy is linked to  $\beta$ -  
225 amyloid and tau in preclinical Alzheimer disease. *Neurology* 2015; 85: 1254-1260.
- 226 4. Halliday G. Pathology and hippocampal atrophy in Alzheimer's disease.  
227 [www.thelancet.com/neurology](http://www.thelancet.com/neurology) 2017; 16: 862-864.
- 228 5. Schmidt F, Boltze J, Jager C, et al. Detection and quantification of  $\beta$ -amyloid,  
229 pyroglutamyl A $\beta$ , and tau in aged canines. *J Neuropath Exp Neurol* 2015; 74: 912-923.
- 230 6. Schroder J, Pantel J. Neuroimaging of hippocampal atrophy in early recognition of  
231 Alzheimer's disease-a critical appraisal after two decades of research. *Psychiatry*  
232 *Research: Neuroimaging* 2016; 247: 71-78.
- 233 7. Bosco P, Redolfi A, Bocchetta M, et al. The impact of automated hippocampal volumetry  
234 on diagnostic confidence in patients with suspected Alzheimer's disease: a European  
235 Alzheimer's disease consortium study. *Alzheimer's & Dementia* 2017; 13: 1013-1023.
- 236 8. Bayram E, Caldwell JZK, Banks SJ. Current understanding of magnetic resonance  
237 imaging biomarkers and memory in Alzheimer's disease. *Alzheimer's & Dementia* 2018;  
238 4: 395-413.

- 239 9. Dhikav V, Duraiswamy S, Anand KS. Correlation between hippocampal volumes and  
240 medial temporal lobe atrophy in patients with Alzheimer's disease. *Ann Indian Acad*  
241 *Neurol* 2017; 20: 29-35.
- 242 10. Schutt T, Toft N, Berendt M. Cognitive dysfunction, progression of age-related  
243 behavioral changes, biomarkers, and survival in dogs more than 8 years old. *J Vet Intern*  
244 *Med* 2015; 29: 1569-1577.
- 245 11. Hasegawa D, Yayoshi N, Fujita Y, et al. Measurement of interthalamic adhesion  
246 thickness as a criteria for brain atrophy in dogs with and without cognitive dysfunction  
247 (dementia). *Vet Radiol Ultrasound* 2005; 46: 452-457.
- 248 12. Estey CM, Dewey CW, Rishniw M, et al. A subset of dogs with presumptive idiopathic  
249 epilepsy show hippocampal asymmetry: a volumetric comparison with non-epileptic dogs  
250 using MRI. *Front Vet Sci* 2017: doi:10.3389/fvets.2017.00183.
- 251 13. Leigh EJ, Mackillop E, Robertson ID, Hudson LC. Clinical anatomy of the canine brain  
252 using magnetic resonance imaging. *Vet Radiol Ultrasound* 2008; 49: 113-121.
- 253 14. Milne ME, Anderson GA, Chow KE, et al. Description of technique and lower reference  
254 limit for magnetic resonance imaging of hippocampal volumetry in dogs. *Am J Vet Res*  
255 2013; 74: 224-231.
- 256 15. Bland JM, Altman DG. Measuring agreement in method comparison studies. *Stat*  
257 *Methods Med Res* 1999; 8: 136-160.
- 258 16. Ferrari BL, Campos Neto G, Nucci MP, et al. The accuracy of hippocampal volumetry  
259 and glucose metabolism for the diagnosis of patients with suspected Alzheimer's disease,  
260 using automatic quantitative clinical tools. *Medicine* 2019; 98: 45.

- 261 17. Kirschen GW, Ge S. Young at heart: insights into hippocampal neurogenesis in the aged  
262 brain. *Behavioural Brain Research* 2019; <https://doi.org/10.1016/j.bbr.2019.111934>.
- 263 18. Llorens-Martin M. Exercising new neurons to vanquish Alzheimer disease. *Brain*  
264 *Plasticity* 2018; 4: 111-126.
- 265 19. Seminara RS, Jeet C, Biswas S, et al. The neurocognitive effects of Ghrelin-induced  
266 signaling on the hippocampus: a promising approach to Alzheimer's disease. *Cureus*  
267 2018; doi: 10.7759/cureus.3285.
- 268 20. Islam MR, Young MF, Wrann CD. The role of FNDC5/Irisin in the nervous system as a  
269 mediator for beneficial effects of exercise on the brain. In: Spiegelman (ed): *Hormones,*  
270 *Metabolism and the Benefits of Exercise, Research and Perspectives in Endocrine*  
271 *Interactions* 2017; [https://doi.org/10.1007/978-3-319-72790-5\\_8](https://doi.org/10.1007/978-3-319-72790-5_8).
- 272 21. Khan IS, D'Agostino EN, Calnan DR, et al. Deep brain stimulation for memory  
273 modulation: a new frontier. *World Neurosurg* 2019; 126: 638-646.
- 274 22. Noh D, Choi S, Choi H, et al. Evaluation of interthalamic adhesion size as an indicator of  
275 brain atrophy in dogs with and without cognitive dysfunction. *Vet Radiol Ultrasound*  
276 2017; 58: 581-587.
- 277 23. Gardini A, Taeymans O, Cherubini GB, et al. Linear magnetic resonance imaging  
278 measurements of the hippocampal formation differ in young versus old dogs. *Vet Record*  
279 2019; doi: 10.1136/vr.105243.
- 280 24. Tapp PD, Siwak CT, Gao FQ, et al. Frontal lobe volume, function, and  $\beta$ -amyloid  
281 pathology in a canine model of aging. *The Journal of Neuroscience* 2004; 24: 8205-8213.

282

283

Figure 1. Examples of hippocampal volume (A) and total brain volume (B) procurement from MR images using Mimics® software.

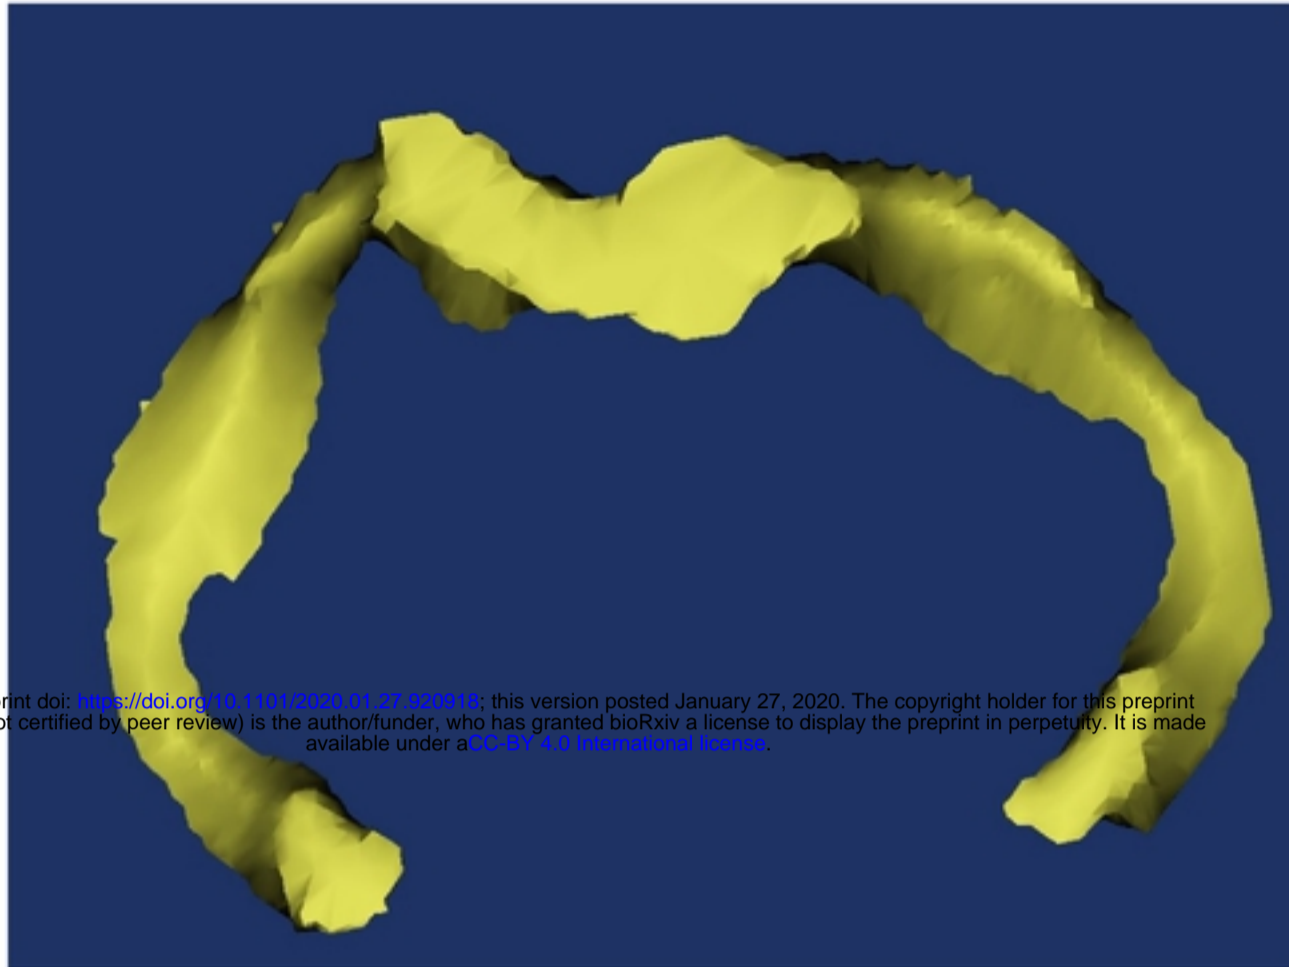

bioRxiv preprint doi: <https://doi.org/10.1101/2020.01.27.520918>; this version posted January 27, 2020. The copyright holder for this preprint (which was not certified by peer review) is the author/funder, who has granted bioRxiv a license to display the preprint in perpetuity. It is made available under a [CC-BY 4.0 International license](#).

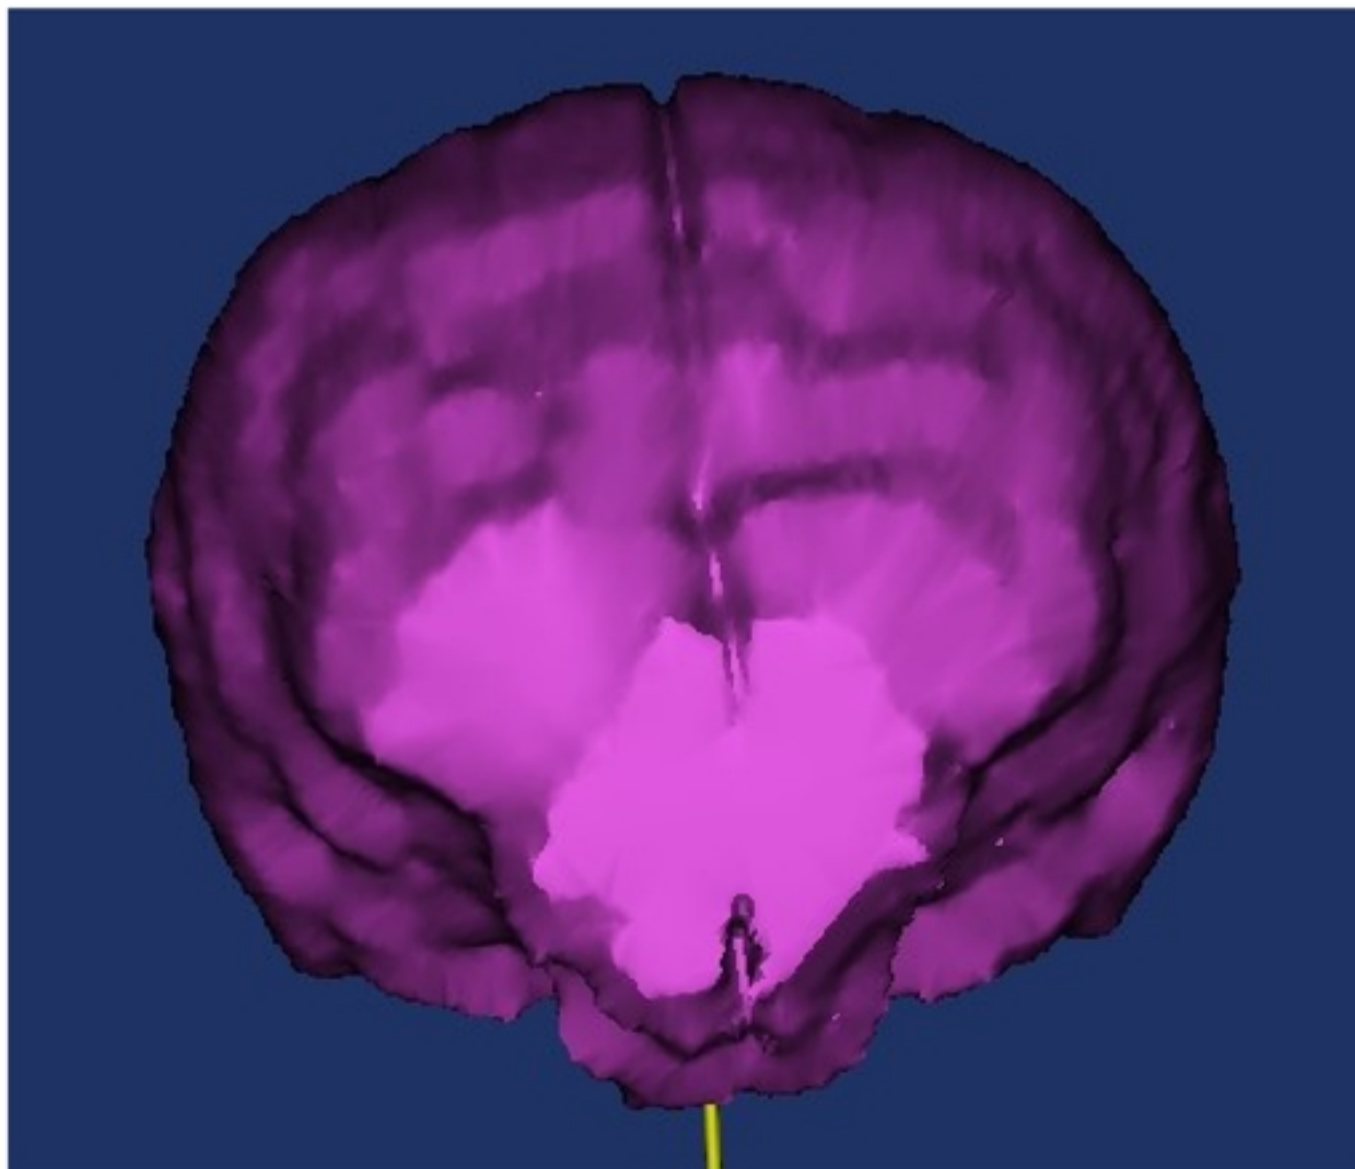

**Figure 2.** Normalized hippocampal volumes vs. age for controls (black circles) and CCD dogs (open triangles). Logistic regression analysis is provided for each group.

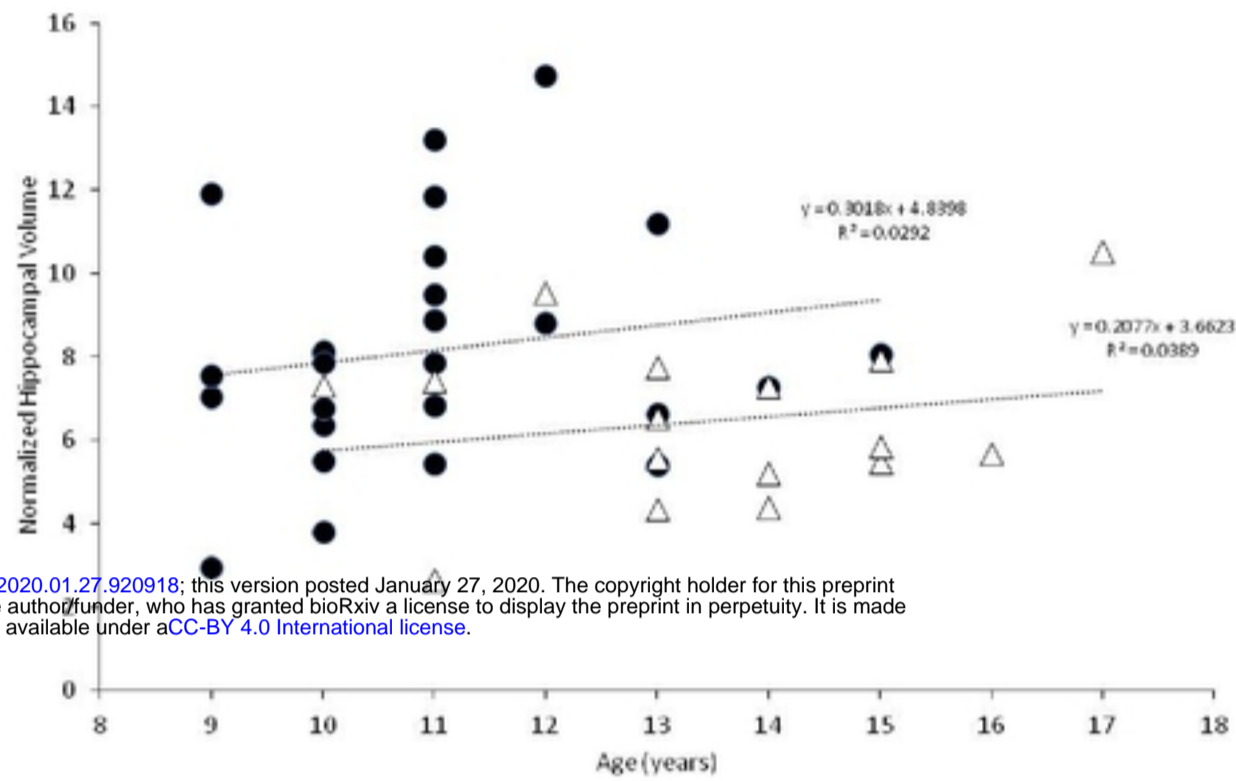

bioRxiv preprint doi: <https://doi.org/10.1101/2020.01.27.920918>; this version posted January 27, 2020. The copyright holder for this preprint (which was not certified by peer review) is the author/funder, who has granted bioRxiv a license to display the preprint in perpetuity. It is made available under a [CC-BY 4.0 International license](https://creativecommons.org/licenses/by/4.0/).

**Figure 3.** Box and whisker plots comparing normalized hippocampal volumes between aging control dogs and dogs with CCD.

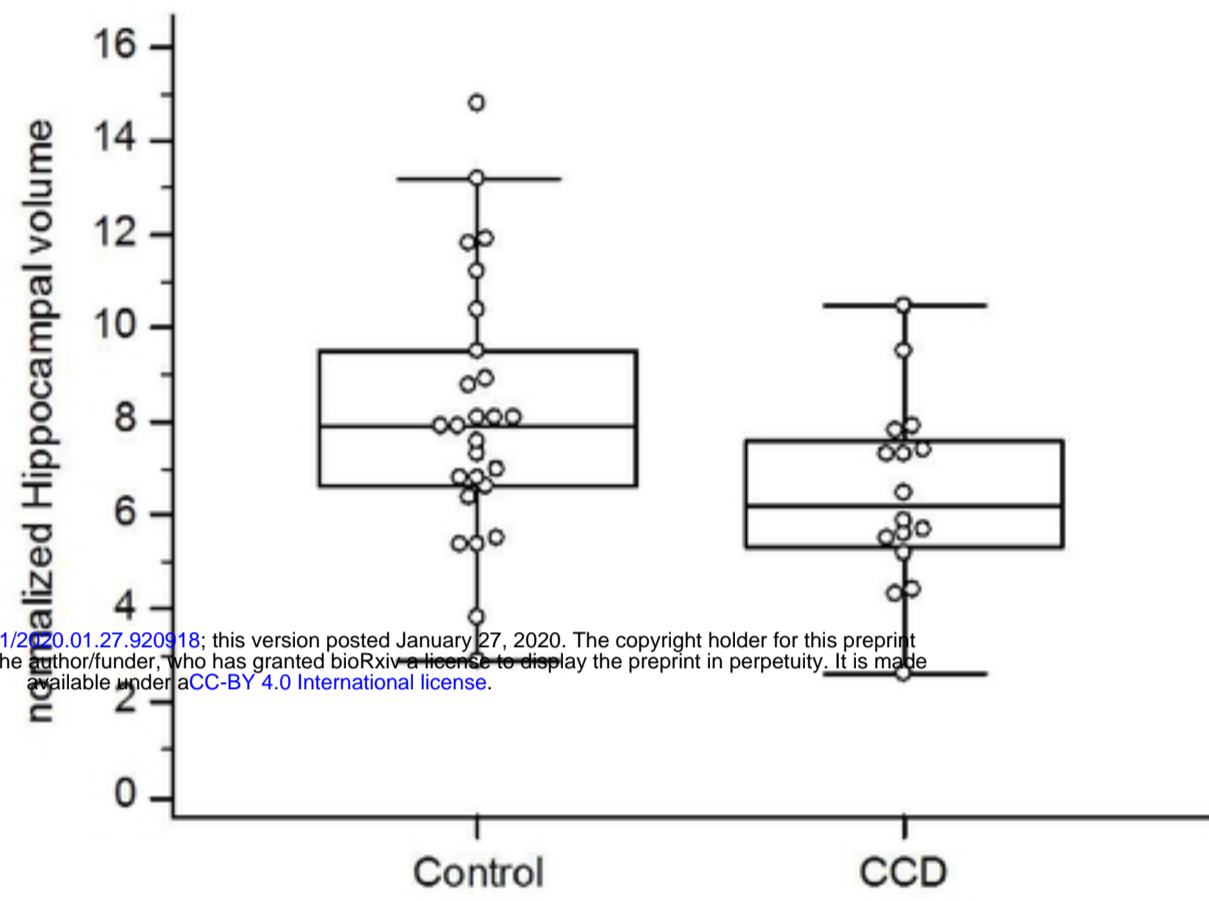

bioRxiv preprint doi: <https://doi.org/10.1101/2020.01.27.920918>; this version posted January 27, 2020. The copyright holder for this preprint (which was not certified by peer review) is the author/funder, who has granted bioRxiv a license to display the preprint in perpetuity. It is made available under aCC-BY 4.0 International license.
